# Supplementary material
Source: Springer Nature journal article supplement (https://www.springerprofessional.de/resource/supplementary/40294_2012_10_MOESM1_ESM.pdf/11899528)

diffusion

unit movement

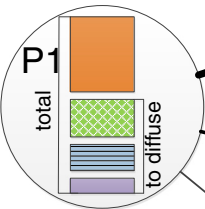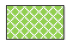

P2

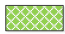

P5

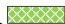

P7

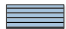

P3

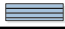

P6

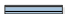

P4

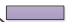

Supplement: MOESM1 [file 11899528]
